# Supplementary material for: Optimum Synthesis of Pencil Beams with Constrained Dynamic Range Ratio
Source: Hindawi journal article supplement (doi:10.1155/2022/3664607), 2022-11-16
Supplement: f1 [file 3664607.f1.zip]

Archive with 12 entries (12 files):
- Contents.m
- pb_be.m
- pb_examples.m
- pb_global.m
- pb_mindrr.m
- pb_positive.m
- pb14.m
- pb15.m
- pb22.m
- pb23.m
- pbsolver.m
- readme.txt
